# Supplementary material for: Genome-Wide Association Study of Serum Creatinine Levels during Vancomycin Therapy
Source: PLoS One. 2015 Jun 1;10(6):e0127791. doi: 10.1371/journal.pone.0127791 (PMC4452656; doi:10.1371/journal.pone.0127791)
Supplement: S1 Table — (DOCX) [file pone.0127791.s005.docx]

**S1 Table.** **Nephrotoxic medications.**

| **Category** | **Drug name in electronic medical record** | **Category** | **Drug name in electronic medical record** |
| --- | --- | --- | --- |
| Angiotensin converting enzyme inhibitors | Lisinopril | Foscarnet | Foscarnet |
| Enalapril | Ganciclovir | Ganciclovir |
| Captopril | Intravenous immunoglobulin | Immune globulin IV |
| Altace | IVIG |
| Ramipril | Methotrexate | Methotrexate |
| Enalaprilat | Nonsteroidal anti-inflammatory drugs | Aspirin |
| Benazepril | Ibuprofen |
| Accupril | ASA |
| Quinapril | Ketorolac |
| Zestril | Toradol |
| Fosinopril sodium | Celebrex |
| Zestoretic 20/25 | Mobic |
| Enalapril maleate | Celecoxib |
| Acyclovir | Acyclovir | Naproxen |
| Zovirax | Aspirin enteric coated |
| Allopurinol | Allopurinol | Motrin |
| Zyloprim | Indomethacin |
| Aminoglycoside | Gentamicin | Advil |
| Tobramycin | Meloxicam |
| Amikacin | Baby aspirin |
| Amikin | Aleve |
| Amphotericin | Amphotericin B | Voltaren |
| Fungizone | Nabumetone |
| Amphotericin B lipid complex | Excedrin |
| Amphotericin | Ecotrin |
| Abelcet | Darvon |
| Candesartan | Candesartan | Ketoprofen |
| Mycophenolic acid | Mycophenolate | Arthritis pain |
| Cellcept | Excedrin extra strength |
| Mycophenolate mofetil | Fiorinal |
| Cimetidine | Tagamet | Percodan |
| Ciprofloxacin | Ciprofloxacin | Asprin |
| Cipro | Oxaprozin |
| Ciprodex | Diclofenac sodium |
| Contrast | Optiray 320 | Indocin |
| Omnipaque 350 | Naprosyn |
| Visipaque | Piroxicam |
| Gadolinium | Diclofenac |
| IV contrast | Lodine |
| Radiopaque | Tacrolimus | Tacrolimus |
| Cyclosporine | Cyclosporine | Prograf |
| CSA | Tenofovir | Tenofovir disoproxil fumarate |
| Cyclosporine | Valsartan | Valsartan |
| Sandimmune | Diovan |
| Neural | Diovan hct 80/12.5 |
|  | Diovan hct 160/12.5 |
